# Supplementary material for: Placental Galectins Are Key Players in Regulating the Maternal Adaptive Immune Response
Source: PubMed Central journal article supplement (PMC6593412; doi:10.3389/fimmu.2019.01240), 2019-06-19
Supplement: Presentation_1.pdf [file Presentation_1.pdf]

## *Supplementary Material*

**Supplementary Table 1. Immunohistochemistry conditions**

| <b>Primary antibody<br/>(concentration, distributor)</b>                                        | <b>Secondary antibody<br/>(concentration, distributor)</b>     | <b>Detection antibody<br/>(distributor)</b>                                     | <b>Detection system<br/>(distributor)</b>                      |
|-------------------------------------------------------------------------------------------------|----------------------------------------------------------------|---------------------------------------------------------------------------------|----------------------------------------------------------------|
| Mouse monoclonal anti-human galectin-13 antibody (2µg/ml)<br>(Hy Laboratories)                  | -                                                              | Rabbit anti-mouse IgG and anti-rabbit poly-HRP-IgG<br>(Novocastra Laboratories) | Novolink Polymer Detection System<br>(Novocastra Laboratories) |
| Recombinant anti-human galectin-14 antibody with His <sub>6</sub> -tag (0.65µg/ml)<br>(Bio-Rad) | Monoclonal anti-His-tag antibody (5µg/ml)<br>(Merck-Millipore) | Rabbit anti-mouse IgG and anti-rabbit poly-HRP-IgG<br>(Novocastra Laboratories) | Novolink Polymer Detection System<br>(Novocastra Laboratories) |

**Supplementary Table 2. Western blot conditions**

| <b>Primary antibody<br/>(concentration)</b>                  | <b>Primary antibody<br/>source</b> | <b>HRP-antibody<br/>(dilution)</b>                    | <b>HRP-antibody<br/>source</b> |
|--------------------------------------------------------------|------------------------------------|-------------------------------------------------------|--------------------------------|
| Mouse monoclonal anti-human<br>galectin-13 antibody (1µg/ml) | Hy Laboratories                    | Goat anti-mouse IgG<br>(1:5,000)                      | ThermoFisher<br>Scientific     |
| Recombinant anti-human<br>galectin-14 antibody (1µg/ml)      | Bio-Rad                            | Goat anti-human IgG<br>F(ab') <sub>2</sub> (1:10,000) | Bio-Rad                        |

**Supplementary Table 3. Flow cytometry antibodies/reagents**

| <b>Antibody/Reagent</b>                 | <b>Clonality</b> | <b>Amount/test</b> | <b>Source (Cat. #)</b>                                                                                     |
|-----------------------------------------|------------------|--------------------|------------------------------------------------------------------------------------------------------------|
| <b>human FcR blocking reagent</b>       | -                | 2 $\mu$ l          | Miltenyi Biotec (130-059-901)                                                                              |
| <b>Gal-13-CF488 recombinant protein</b> | -                | 5 $\mu$ g          | MBP-tag modified version of the Gal-13 expression plasmid which was provided by Prof. R. Romero (PRB, NIH) |
| <b>Gal-14-CF488 recombinant protein</b> | -                | 5 $\mu$ g          | MBP-tag modified version of the Gal-13 expression plasmid which was provided by Prof. R. Romero (PRB, NIH) |
| <b>anti-human CD3-APC</b>               | monoclonal       | 2.5 $\mu$ l        | Biolegend (317318)                                                                                         |
| <b>anti-human CD4-PerCP/Cy5.5</b>       | monoclonal       | 2.5 $\mu$ l        | Biolegend (317428)                                                                                         |
| <b>anti-human CD8-FITC</b>              | monoclonal       | 2.5 $\mu$ l        | Biolegend (301006)                                                                                         |
| <b>anti-human CD8-APC/Fire750</b>       | monoclonal       | 2.5 $\mu$ l        | Biolegend (301066)                                                                                         |
| <b>mouse IgG1-PE</b>                    | monoclonal       | 2.5 $\mu$ l        | Biolegend (400114)                                                                                         |
| <b>mouse IgG2a-PerCP/Cy5.5</b>          | monoclonal       | 2.5 $\mu$ l        | Biolegend (400252)                                                                                         |
| <b>anti-human CD25-PE</b>               | monoclonal       | 2.5 $\mu$ l        | Biolegend (356104)                                                                                         |
| <b>anti-human CD71-PerCP/Cy5.5</b>      | monoclonal       | 2.5 $\mu$ l        | Biolegend (334114)                                                                                         |
| <b>anti-human CD95-PE</b>               | monoclonal       | 5 $\mu$ l          | BD Biosciences (555674)                                                                                    |
| <b>anti-human HLA-DR-PerCP/Cy5.5</b>    | monoclonal       | 2.5 $\mu$ l        | Biolegend (307630)                                                                                         |
| <b>Annexin V-PE</b>                     | -                | 5 $\mu$ l          | ThermoFisher Scientific (88-8102-74)                                                                       |
| <b>7-AAD</b>                            | -                | 5 $\mu$ l          | ThermoFisher Scientific (88-8102-74)                                                                       |

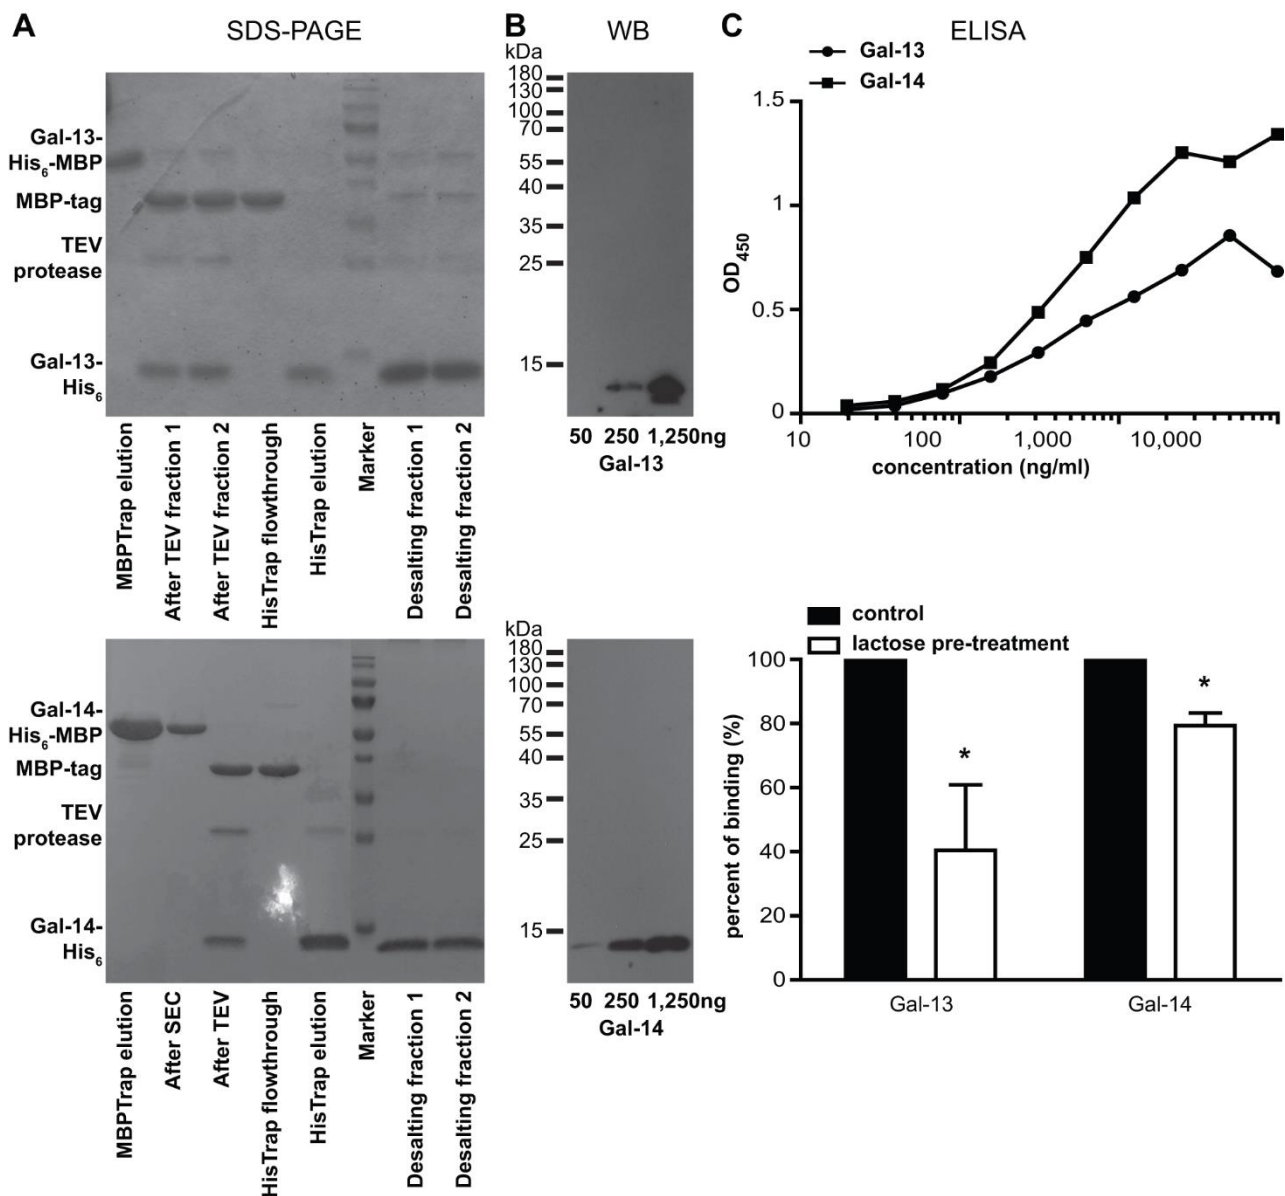

**Supplementary Figure 1. Production of recombinant galectins.** (A) Recombinant Gal-13 and Gal-14 were expressed in ClearColi BL21. Purification steps were monitored by 15% SDS-PAGE: 1) affinity chromatography on MBPTrap HP column; 2) size exclusion chromatography (SEC) for Gal-14; 3) MBP cleavage by TEV protease; 4) affinity chromatography on HisTrap HP column; 5) desalting and buffer exchange. Recombinant galectins with His<sub>6</sub>- and MBP-tags have approx. 59 kDa. The MBP-tag is ~42 kDa, TEV protease is ~26 kDa, and the TEV-cleaved galectins with the His<sub>6</sub>-tag are ~17 kDa in the monomeric form. Representative gels for Gal-13 (upper image) or Gal-14 (lower image) are displayed. (B) Purified galectins were subjected to Western blot analysis with specific antibodies to Gal-13 or Gal-14 and subsequently with HRP-conjugated secondary antibodies. Representative blots for Gal-13 (upper image) or Gal-14 (lower image) are shown, with specific bands at ~17 kDa. (C) Binding of purified galectins to asialofetuin (ASF) was assayed by ELISA. ASF was absorbed to microtiter plates. After blocking, serially diluted Gal-13 or Gal-14 was added, followed by incubation with anti-His<sub>6</sub>-HRP. TMB served as the enzyme substrate (450 nm, reference filter: 620 nm). The upper graph is representative of three independent measurements. Binding of 50 µg/ml Gal-13 or Gal-14 to ASF with or without (control, taken as 100%) pre-treatment on lactose-agarose beads is displayed on the lower graph as mean ± SEM of three independent measurements. One sample t-test was used for the comparison of the binding of Gal-13 and Gal-14 to ASF with or without lactose pre-treatment (\**p* < 0.05). Horseradish peroxidase, HRP; maltose-binding protein, MBP; Tobacco Etch virus, TEV.

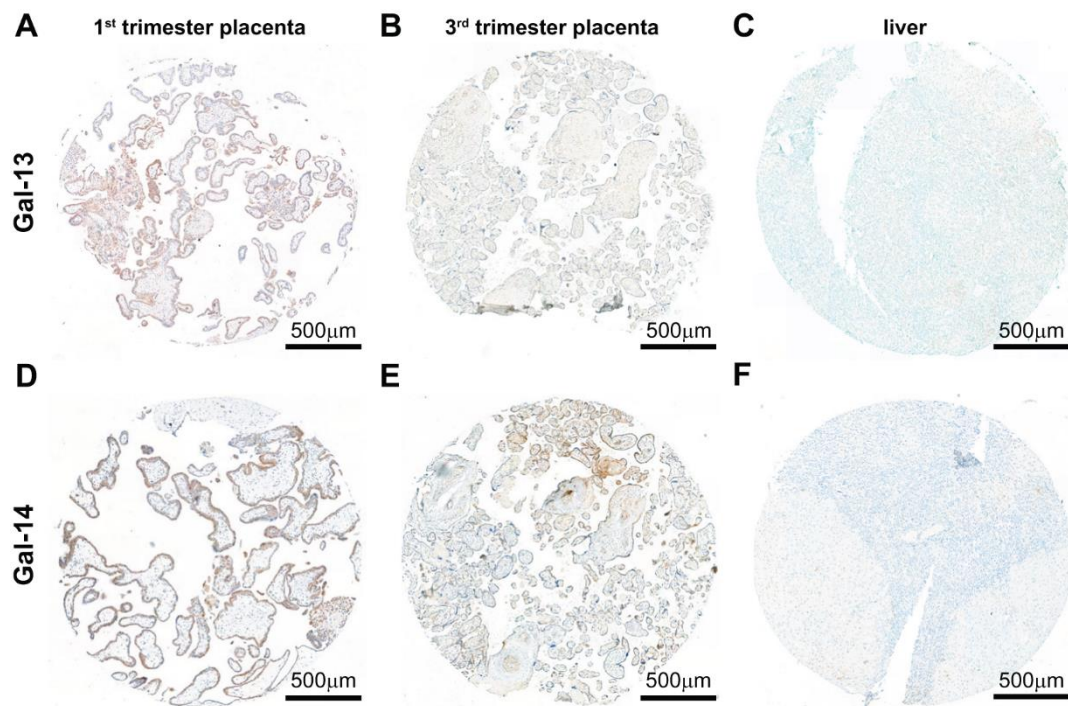

**Supplementary Figure 2. Galectin-13 and galectin-14 expression in first trimester placentas.** 2 mm diameter representative TMA cores are presented from first trimester placentas (**A, D**), positive control third trimester placentas (**B, E**) or negative control livers (**C, F**). TMAs were either stained for Gal-13 (**A-C**) or Gal-14 (**D-F**) using specific monoclonal antibodies. Chorionic villi exhibited more intense syncytiotrophoblast cytoplasmic staining in the first trimester than in the third trimester for both Gal-13 and Gal-14, while livers did not stain. Hematoxylin counterstain, 40x magnifications. Tissue microarray, TMA.

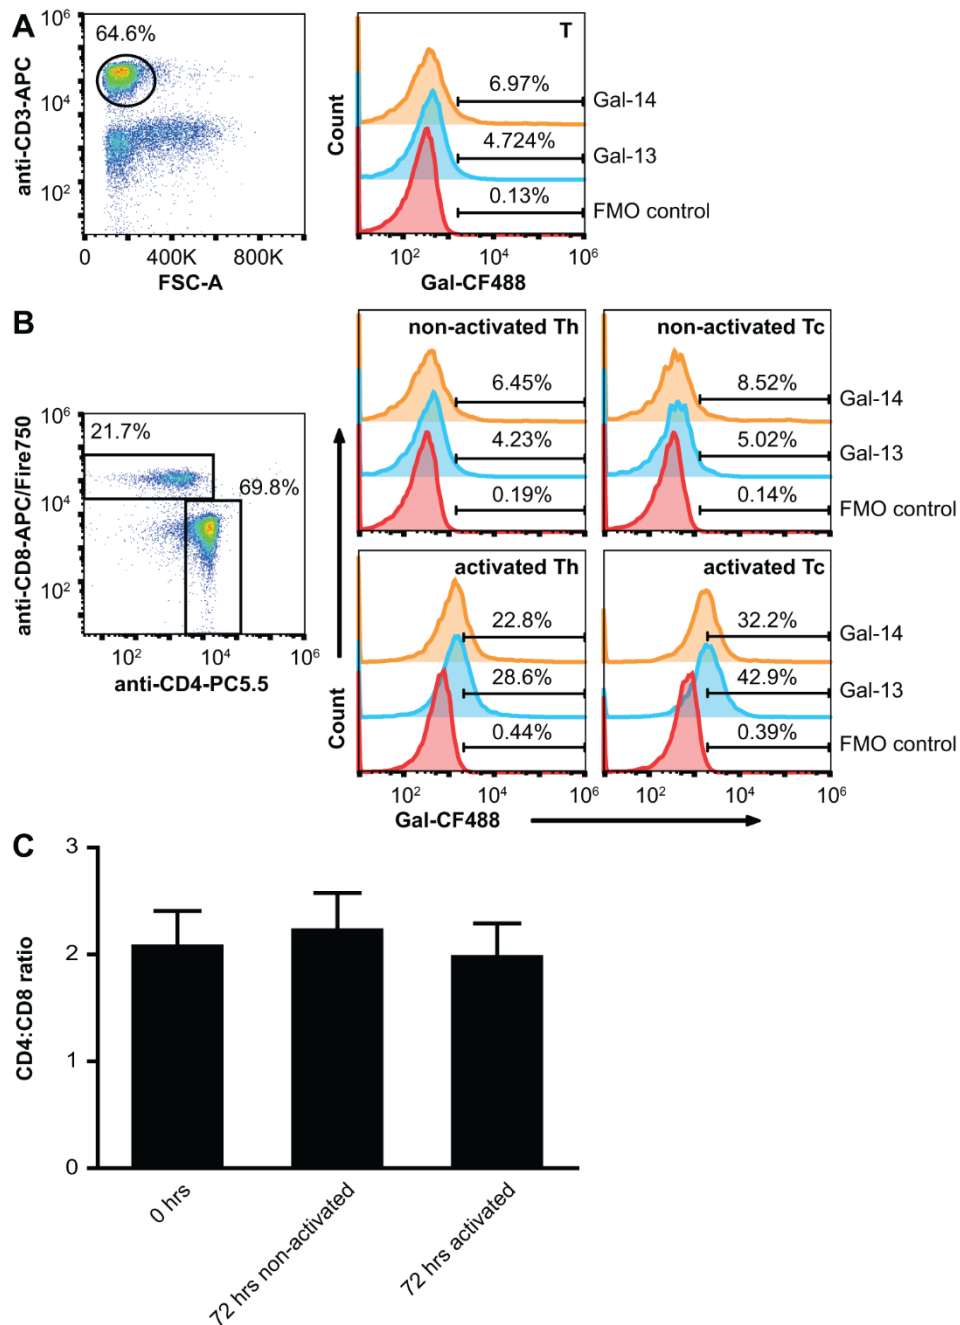

**Supplementary Figure 3. Galectin-13 and galectin-14 bind to T lymphocytes.** (A) To detect binding of Gal-13 or Gal-14 to human T lymphocytes, freshly isolated PBMCs (A) or PBMCs, kept in culture for 72 h in the presence (activated) or absence (non-activated) of anti-CD3/CD28 microbeads (B), were incubated with 4  $\mu$ M Gal-13-CF488 or Gal-14-CF488 for 45 min on ice. Cells were also stained for CD3 (anti-CD3-APC), CD4 (anti-CD4-PC5.5), and CD8 (anti-CD8-APC/Fire750), in order to distinguish between helper (Th) and cytotoxic (Tc) T lymphocytes during flow cytometric measurements. (A) A dot plot showing gating on all T cell, and a representative histogram of Gal-13 (blue) or Gal-14 (orange) binding to T lymphocytes are displayed (red: FMO control). (B) A dot plot showing the gating on Th and Tc cell, and representative histograms of Gal-13 (blue) or Gal-14 (orange) binding to Th or Tc lymphocytes upon activation is displayed (red: FMO control). (C) The graph shows CD4:CD8 ratio of freshly isolated PBMCs or PBMCs activated or not with anti-CD3/CD28 microbeads for 72 h (mean  $\pm$  SEM). Repeated ANOVA with Tukey's post hoc test was used for the comparison of groups. Fluorescence minus one, FMO; peripheral blood mononuclear cells, PBMCs.

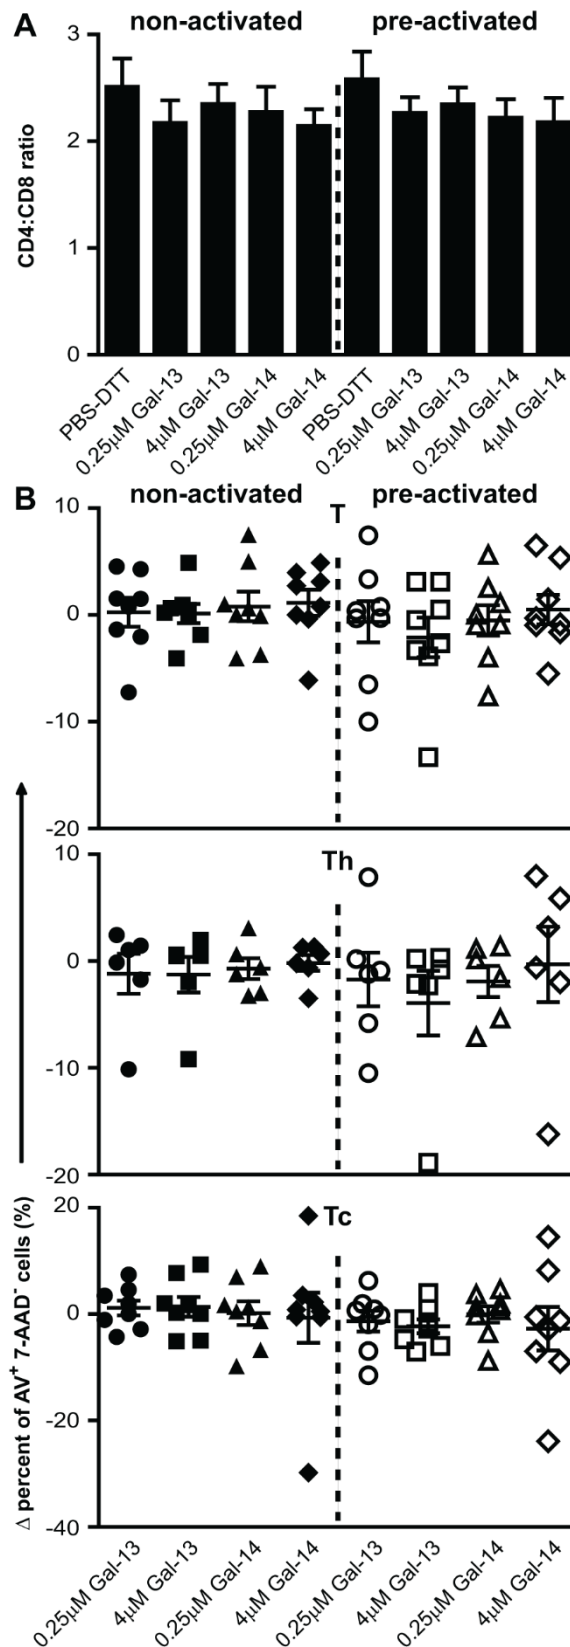

**Supplementary Figure 4. Treatment of T cells with galectin-13 or galectin-14 did not alter the percentage of early apoptotic cells.** PBMCs were kept in culture for 72 h in the presence (activated) or absence (non-activated) of anti-CD3/CD28 microbeads, then treated with Gal-13 or Gal-14 for 24 h. Cells were stained with Annexin V-PE and 7-AAD and were also stained for CD3 (anti-CD3-APC), and CD8 (anti-CD8-FITC), in order to distinguish between helper (Th) and cytotoxic (Tc) T lymphocytes during flow cytometric measurements. **(A)** CD4:CD8 ratio upon different treatments (mean ± SEM) is displayed, using repeated ANOVA with Tukey's post hoc for the comparison of groups. **(B)** Graphs show the Δ percentage of single positive (Annexin V-PE<sup>+</sup> 7-AAD<sup>-</sup>) cells as mean ± SEM, using one sample t-test for the comparison of galectin-treated groups with the PBS-DTT-treated group of non-activated or pre-activated cells. Six-eight non-pregnant female donors were included in each group. Peripheral blood mononuclear cells, PBMCs.

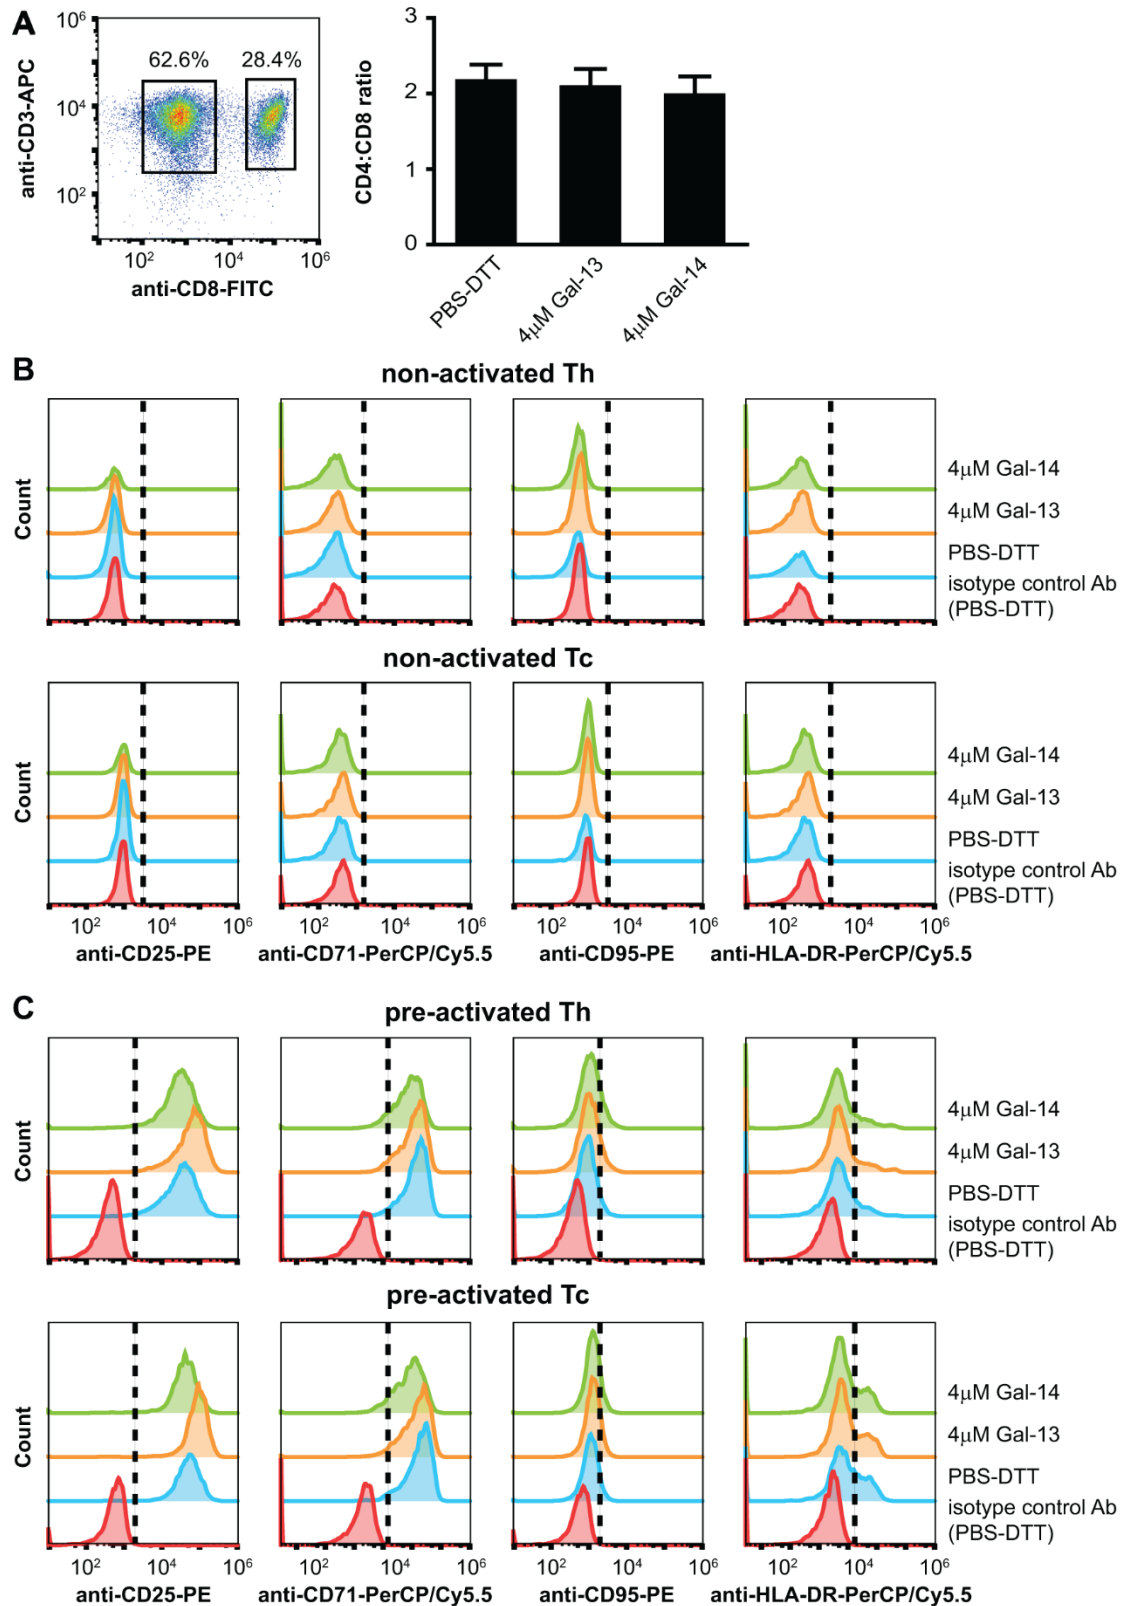

**Supplementary Figure 5. Activation marker expression on T lymphocytes upon galectin treatment.**

PBMCs were kept in culture for 72 h in the presence or absence of anti-CD3/CD28 microbeads, then treated with Gal-13 or Gal-14 for 24 h. To detect cell surface expression of CD25, CD71, CD95, HLA-DR activation markers on T lymphocytes, cells were stained with anti-CD25-PE and anti-CD71-PerCP/5.5, or anti-CD95-PE and anti-HLA-DR-PerCP/5.5. Cells were also stained for CD3 (anti-CD3-APC), and CD8 (anti-CD8-FITC) in order to distinguish between helper (Th) and cytotoxic (Tc) T cells during flow cytometric measurements. Representative dot plot of CD3 and CD8 staining, CD4:CD8 ratio of pre-activated and Gal-treated cells (mean  $\pm$  SEM, **A**), and demonstrative histograms of the results of 2 (non-activated, **B**) or 4-6 (pre-activated, **C**) non-pregnant female donors are displayed. Dashed lines show the border between negative and positive populations. Repeated ANOVA with Tukey's post hoc test was used for the comparison of CD4:CD8 ratio upon different treatments. Human leukocyte antigen DR isotype, HLA-DR; peripheral blood mononuclear cells, PBMCs.
